# Supplementary material for: 477.ディジタル型ハンドフットクロスモニタによる汚染評価(第40回総会会員研究発表)(管理技術-8 RI管理)
Source: PeerJ journal article supplement (doi:10.7717/peerj.15743), 1984-08-15
Supplement: activities.pdf [file activities.pdf]

## Pesticidal and antimicrobial activities

### Pesticidal activity against *Sitophilus oryzae* (%)

|             |     | Plant extract | ZnO-NPs | Control |       |
|-------------|-----|---------------|---------|---------|-------|
| T1 (0.75 %) | 24H |               | 3       | 9       | 37.7  |
|             | 48H |               | 5       | 25      | 64.4  |
|             | 72H |               | 7       | 34      | 91.1  |
| T2 (1.5%)   | 24H |               | 5       | 16      | 55.5  |
|             | 48H |               | 7       | 29      | 80    |
|             | 72H |               | 12      | 43      | 95.5  |
| T3 (3%)     | 24H |               | 9       | 20      | 75.55 |
|             | 48H |               | 16      | 36      | 86.6  |
|             | 72H |               | 23      | 58      | 100   |
| T4 (6%)     | 24H |               | 16      | 23      | 89.5  |
|             | 48H |               | 18      | 38      | 93.2  |
|             | 72H |               | 25      | 74      | 95.5  |

### Pesticidal activity against *Tribolium castaneum* (%)

|             |     | Plant extract | ZnO-NPs | Control |       |
|-------------|-----|---------------|---------|---------|-------|
| T1 (0.75 %) | 24H |               | 5       | 9       | 33.3  |
|             | 48H |               | 7       | 27      | 62.2  |
|             | 72H |               | 9       | 43      | 88.8  |
| T2 (1.5%)   | 24H |               | 9       | 18      | 51    |
|             | 48H |               | 16      | 34      | 77.7  |
|             | 72H |               | 23      | 56      | 93.33 |
| T3 (3%)     | 24H |               | 12      | 20      | 71.1  |
|             | 48H |               | 20      | 45      | 84.4  |
|             | 72H |               | 28      | 69      | 97.7  |
| T4 (6%)     | 24H |               | 18      | 25      | 89.5  |
|             | 48H |               | 27      | 45      | 93.2  |
|             | 72H |               | 43      | 78      | 95.5  |

**Antibacterial activity of Silybum marianum against Clavibacter michiganensis (mm)**

|           | <b>Plant extract</b> | <b>ZnO-NPs</b> | <b>Control</b> |      |
|-----------|----------------------|----------------|----------------|------|
| T1 (0.5%) |                      | 6              | 8              | 19.8 |
| T2 (1.5%) |                      | 12             | 14             | 26.8 |
| T3 (3%)   |                      | 17             | 18             | 33.6 |

**Antibacterial activity of Silybum marianum against Pseudomonas syringae (mm)**

|           | <b>Plant extract</b> | <b>ZnO-NPs</b> | <b>Control</b> |      |
|-----------|----------------------|----------------|----------------|------|
| T1 (0.5%) |                      | 8              | 10             | 20.3 |
| T2 (1.5%) |                      | 15             | 19             | 28.8 |
| T3 (3%)   |                      | 20             | 25             | 35.4 |

**Antifungal activity gainst Aspergillums niger (mm)**

|           | <b>Plant extract</b> | <b>ZnO-NPs</b> | <b>Control</b> |      |
|-----------|----------------------|----------------|----------------|------|
| T1 (0.5%) |                      | 7              | 10             | 15.2 |
| T2 (1.5%) |                      | 11             | 12             | 27.3 |
| T3 (3%)   |                      | 18             | 19             | 30.1 |

**Antifungal activity gainst Fusarium oxysporum (mm)**

|           | <b>Plant extract</b> | <b>ZnO-NPs</b> | <b>Control</b> |      |
|-----------|----------------------|----------------|----------------|------|
| T1 (0.5%) |                      | 12             | 13             | 17.4 |
| T2 (1.5%) |                      | 15             | 16             | 30.8 |
| T3 (3%)   |                      | 18             | 21             | 35   |
